# Supplementary material for: Progressive resistance training in Parkinson's disease: a systematic review and meta-analysis
Source: HighWire-hosted journal article supplement (doi:10.1136/bmjopen-2015-008756), 2016-01-01

Supplementary Appendix

### Fast walking speed (m/s)

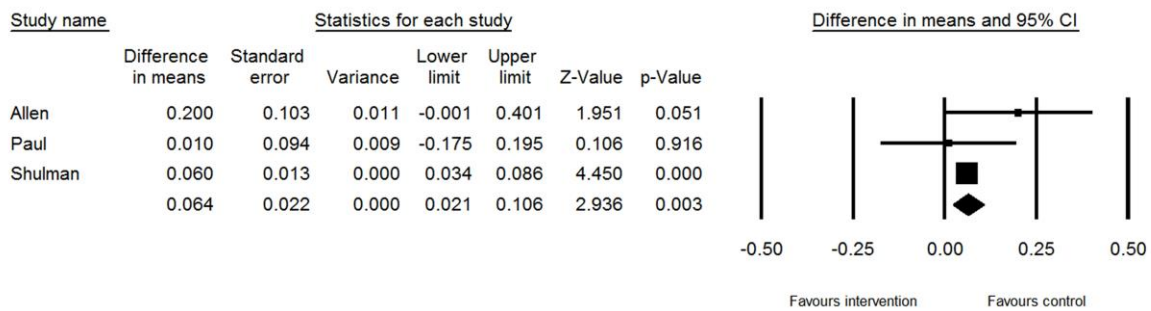

### Comfortable walking speed (m/s)

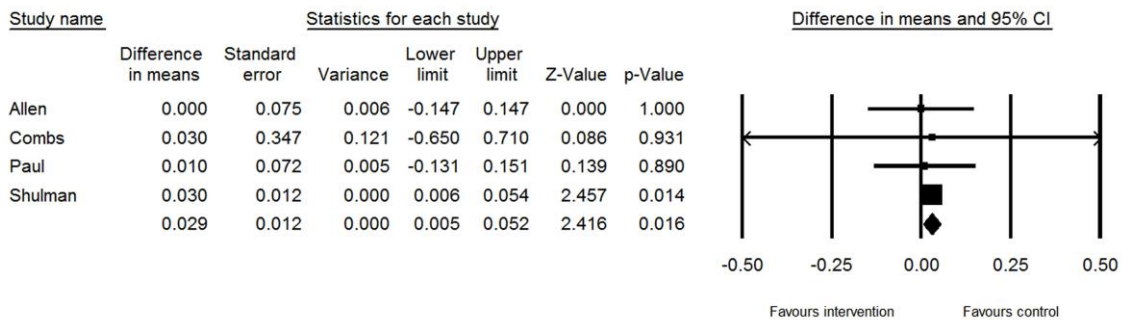

### Timed Up and Go Test (s)

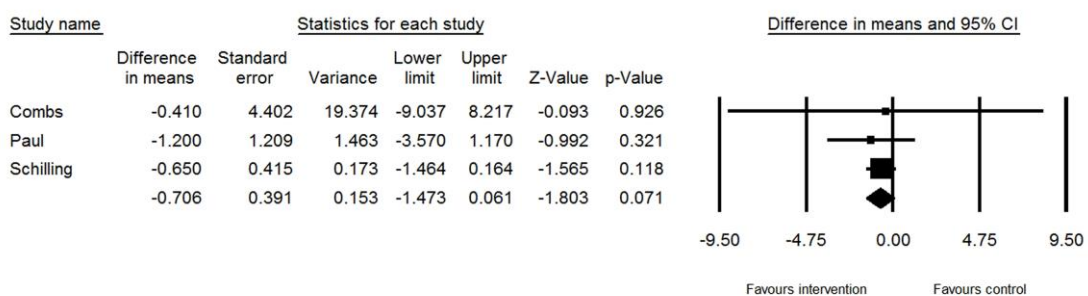

## 6-Minute Walk (m)

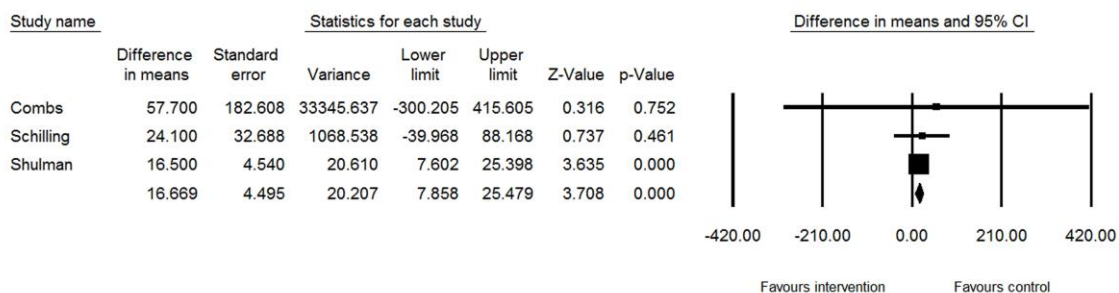

## Maximal oxygen consumption (ml/kg/min)

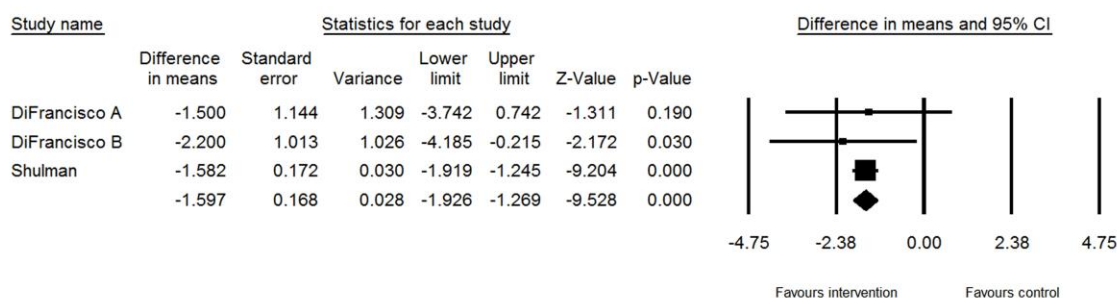

Supplement: bmjopen-2015-008756supp3.pdf [file bmjopen-2015-008756supp3.pdf]
